# Supplementary material for: Impact of Mn-dopant concentration in observing narrowing of band-gap, urbach tail and paramagnetism in anatase TiO2 nanocrystals
Source: Royal Society of Chemistry journal article supplement (doi:10.1039/c9nj02884f), 2019-01-01
Supplement: c9nj02884f1.pdf [file c9nj02884f1.pdf]

## **Supporting information**

# **Impact of Mn-Dopant Concentration in Observing Narrowing of Band-Gap, Urbach tail and Paramagnetism in Anatase TiO<sub>2</sub> Nanocrystals**

V. R. Akshay<sup>1,2</sup>, B. Arun<sup>1,2</sup>, Guruprasad Mandal<sup>3</sup> and M.Vasundhara<sup>1,2\*</sup>

<sup>1</sup>*Materials Science and Technology Division, CSIR-National Institute for Interdisciplinary Science and Technology, Trivandrum -695 019, India.*

<sup>2</sup>*Academy of Scientific and Innovative Research (AcSIR), CSIR-Human Resource Development Centre, Ghaziabad, Uttarpradesh, India.*

<sup>3</sup>*Centre for Rural and Cryogenic Technologies, Jadavpur University, Kolkata-700032*

\*Corresponding author: [mvas@niist.res.in](mailto:mvas@niist.res.in), [vasu.mutta@gmail.com](mailto:vasu.mutta@gmail.com)

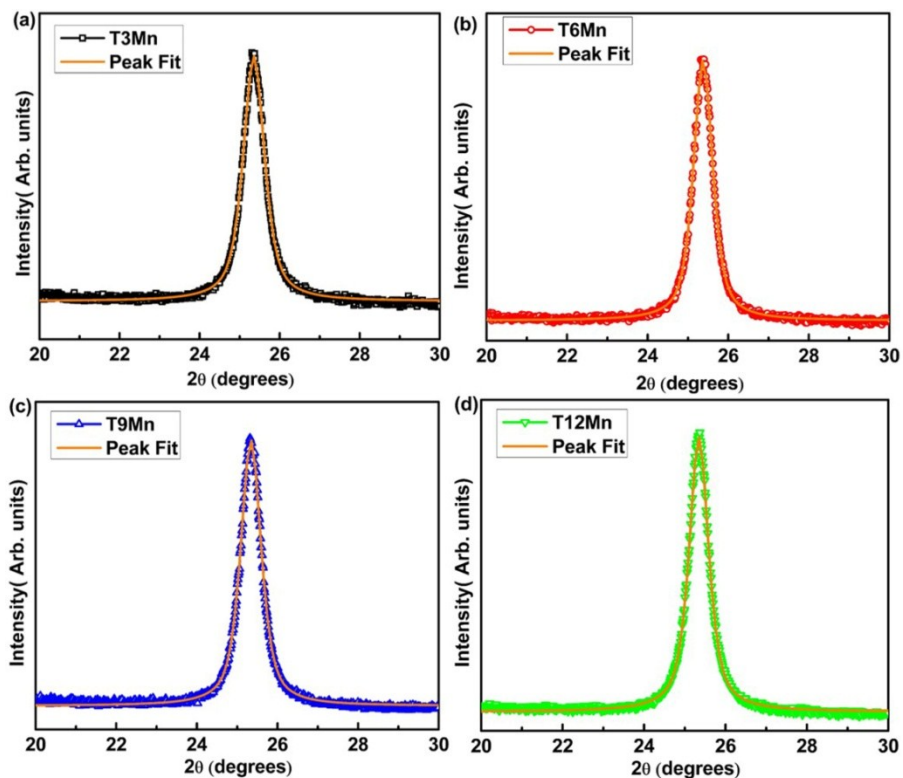

**Fig.S1:** Estimation of FWHM from the most intense (101) peak of all the Mn-doped samples (a) T3Mn, (b) T6Mn, (c) T9Mn and (d) T12Mn

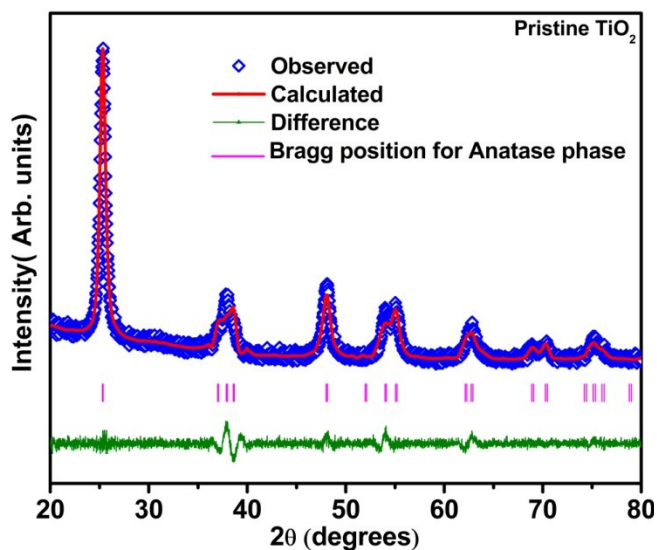

**Figure S2.** Refined XRD patterns of Pristine TiO<sub>2</sub> nanocrystals

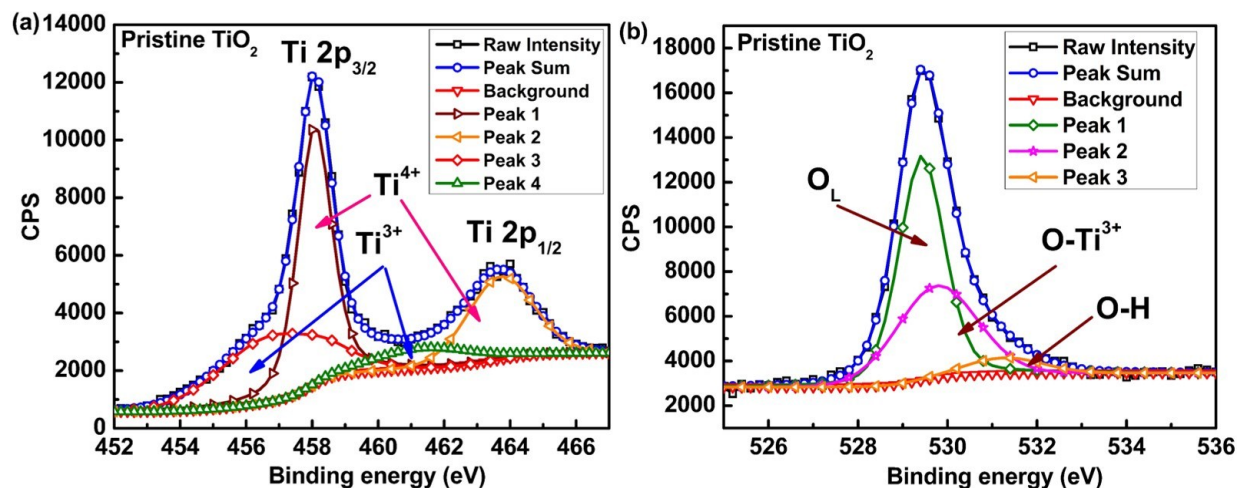

Figure S3. (a) High resolution XPS spectra of (a) Ti 2p and (b) O 1s of Pristine TiO<sub>2</sub>

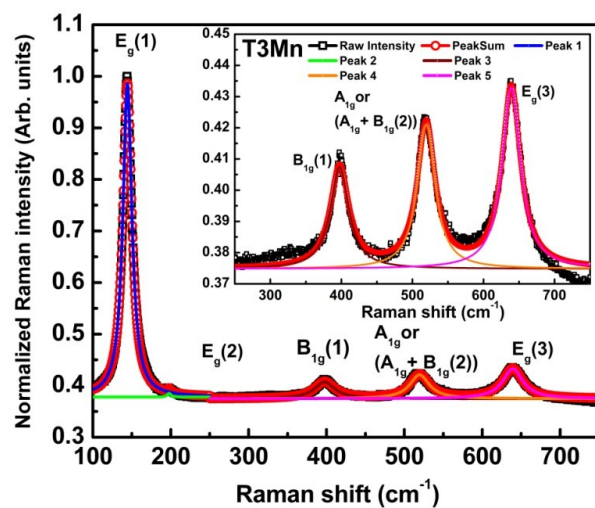

Figure S4: Deconvoluted Raman spectra of 3% Mn-doped TiO<sub>2</sub>

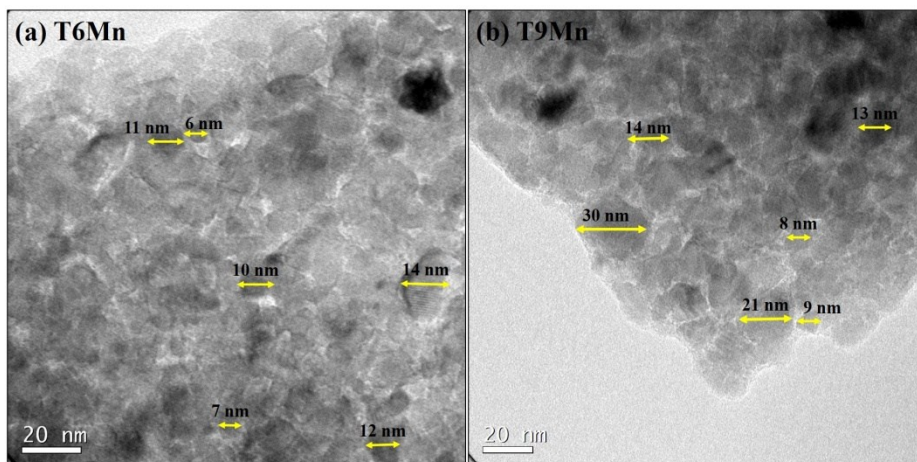

Figure S5: TEM micrographs showing the nanocrystal formation for (a) T6Mn and (b) T9Mn

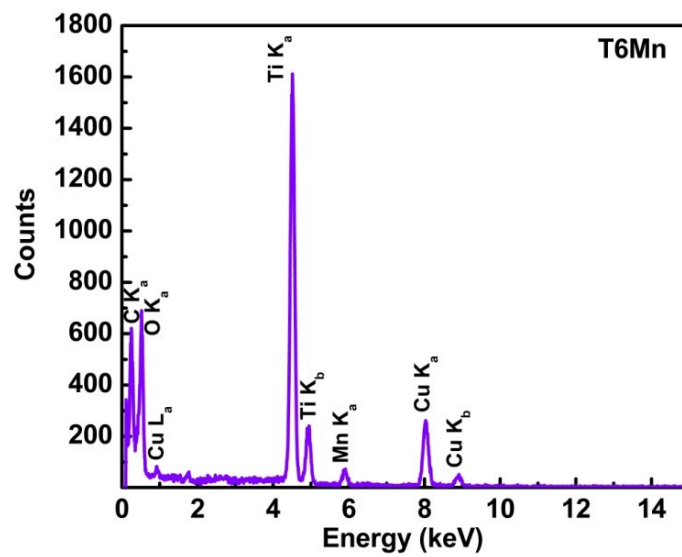

**Figure S6:** EDS spectra of 6% Mn-doped TiO<sub>2</sub> as a representative of the series

**Table S1:** Refinement parameters obtained for undoped and Mn-doped TiO<sub>2</sub> nanocrystals

| <b>Compound</b>                                | <b>Pristine TiO<sub>2</sub></b> | <b>T3Mn</b> | <b>T6Mn</b> | <b>T9Mn</b> | <b>T12Mn</b> |
|------------------------------------------------|---------------------------------|-------------|-------------|-------------|--------------|
| <b>Phase</b>                                   | Anatase                         |             |             |             |              |
| <b>Crystal Structure</b>                       | Tetragonal                      |             |             |             |              |
| <b>Space Group</b>                             | I 41/a m d                      |             |             |             |              |
| <b>Lattice Parameters</b>                      |                                 |             |             |             |              |
| <b>a(Å)</b>                                    | 3.7901(1)                       | 3.7907(4)   | 3.7911(1)   | 3.7923(4)   | 3.7953(5)    |
| <b>c(Å)</b>                                    | 9.4923(3)                       | 9.4926(2)   | 9.4928(1)   | 9.5136(3)   | 9.5035(4)    |
| <b>Volume (Å)<sup>3</sup></b>                  | 136.35(2)                       | 136.40(3)   | 136.43(2)   | 136.82(6)   | 136.89(1)    |
| <b>Atomic positions</b>                        |                                 |             |             |             |              |
| <b>Ti/Mn<sub>x</sub> (4a)</b>                  | 0.0000                          | 0.0000      | 0.0000      | 0.0000      | 0.0000       |
| <b>Ti/Mn<sub>y</sub> (4a)</b>                  | 0.7500                          | 0.7500      | 0.7500      | 0.7500      | 0.7500       |
| <b>Ti/Mn<sub>z</sub> (4a)</b>                  | 0.1250                          | 0.1250      | 0.1250      | 0.1250      | 0.1250       |
| <b>O<sub>x</sub> (8e)</b>                      | 0.0000                          | 0.0000      | 0.0000      | 0.0000      | 0.0000       |
| <b>O<sub>y</sub> (8e)</b>                      | 0.2500                          | 0.2500      | 0.2500      | 0.2500      | 0.2500       |
| <b>O<sub>z</sub> (8e)</b>                      | 0.0835(5)                       | 0.0762(9)   | 0.0755(2)   | 0.0788(8)   | 0.0712(1)    |
| <b>B<sub>iso</sub> (Ti/Mn) (Å)<sup>2</sup></b> | 0.0009                          | 0.0158      | 0.0197      | 0.0261      | 0.0205       |
| <b>B<sub>iso</sub> (O) (Å)<sup>2</sup></b>     | 0.0075                          | 0.0789      | 0.0861      | 0.0324      | 0.0576       |
| <b>Occ (Ti)</b>                                | 0.1250                          | 0.1213      | 0.1175      | 0.1137      | 0.1100       |
| <b>Occ (Mn)</b>                                | -                               | 0.0037      | 0.0075      | 0.0112      | 0.0150       |
| <b>Occ (O)</b>                                 | 0.1250                          | 0.1250      | 0.1250      | 0.1250      | 0.1250       |
| <b>Residual Parameters</b>                     |                                 |             |             |             |              |
| <b>R<sub>p</sub></b>                           | 4.56                            | 3.68        | 3.51        | 3.55        | 2.98         |
| <b>R<sub>wp</sub></b>                          | 5.77                            | 5.15        | 4.79        | 4.85        | 3.90         |
| <b>χ<sup>2</sup></b>                           | 1.89                            | 1.49        | 1.22        | 1.15        | 1.55         |

**Table S2:** Variation of FWHM with Mn doping for all the samples

| <b>Sample</b> | <b>FWHM</b> |
|---------------|-------------|
| TP            | 0.63612     |
| T3Mn          | 0.62970     |
| T6Mn          | 0.60726     |
| T9Mn          | 0.57399     |
| T12Mn         | 0.56651     |

**Table S3:** ED-XRFS results showing Ti:Mn ratio for all the Mn-doped TiO<sub>2</sub> nanocrystals

| <b>Sample</b> | <b>TiO<sub>2</sub><br/>(%)</b> | <b>MnO<br/>(%)</b> | <b>Ti:Mn (Nominal)</b> | <b>Ti:Mn (Real)</b> |
|---------------|--------------------------------|--------------------|------------------------|---------------------|
| T3Mn          | 97.15                          | 2.85               | 32.33                  | 30.26               |
| T6Mn          | 94.31                          | 5.69               | 15.67                  | 14.72               |
| T9Mn          | 91.28                          | 8.72               | 10.11                  | 9.30                |
| T12Mn         | 88.47                          | 11.53              | 7.33                   | 6.82                |
